# Supplementary material
Source: publisher site journal article supplement (https://www.spandidos-publications.com/1700/downloadSupplementary)
Supplement: Supplementary file 1 [file downloadSupplementary]

Figure S1. Integrity of collected RNAs. RNA integrity and gDNA contamination test using denaturing agarose gel electrophoresis. I/R, ischemia/reperfusion.

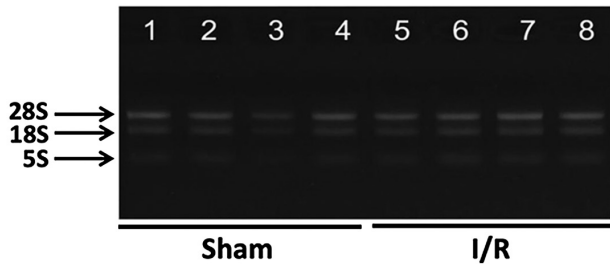

Table SI. RNA quantification and quality assurance using NanoDrop ND-1000.

| Sample ID | OD 260/280 Ratio | OD 260/230 Ratio | Concentration (ng/μl) | Volume (μl) | Quantity (ng) | QC result Pass or Fail |
|-----------|------------------|------------------|-----------------------|-------------|---------------|------------------------|
| Sham-1    | 2.05             | 2.44             | 1470.13               | 20          | 29402.6       | Pass                   |
| Sham-2    | 2.03             | 2.46             | 1137.39               | 20          | 22747.8       | Pass                   |
| Sham-3    | 2.03             | 2.41             | 784.10                | 20          | 15682.0       | Pass                   |
| Sham-4    | 2.02             | 2.48             | 1019.80               | 30          | 30594.0       | Pass                   |
| I/R-1     | 1.99             | 2.43             | 658.29                | 30          | 19748.7       | Pass                   |
| I/R-2     | 2.03             | 2.42             | 965.95                | 30          | 28978.5       | Pass                   |
| I/R-3     | 2.04             | 2.34             | 701.48                | 30          | 21044.4       | Pass                   |
| I/R-4     | 2.02             | 2.46             | 877.75                | 30          | 26332.5       | Pass                   |

OD, optical density; I/R, ischemia/reperfusion; QC, quality control.

Table SII. Top ten up- and downregulated expressed lncRNAs in mice hearts after ischemia/reperfusion procedure.

| A, Upregulated   |            |            |             |                        |
|------------------|------------|------------|-------------|------------------------|
| lncRNA           | RNA length | Chromosome | Fold change | P-value                |
| Gm11407          | 1,058      | chr4       | 21.68       | 4.87x10 <sup>-6</sup>  |
| AK131777         | 775        | chr5       | 15.66       | 4.15x10 <sup>-7</sup>  |
| AK155692         | 532        | chr15      | 14.57       | 1.10x10 <sup>-4</sup>  |
| 1600029O15Rik    | 1,809      | chr9       | 13.41       | 8.19x10 <sup>-6</sup>  |
| AK012512         | 1,150      | chr2       | 13.25       | 1.13x10 <sup>-5</sup>  |
| Mri1             | 1,065      | chr8       | 13.09       | 6.09x10 <sup>-6</sup>  |
| AK198376         | 967        | chr15      | 12.98       | 9.00x10 <sup>-7</sup>  |
| AK134917         | 1,842      | chr13      | 12.84       | 3.04x10 <sup>-5</sup>  |
| AK020500         | 666        | chr9       | 11.81       | 5.28x10 <sup>-6</sup>  |
| Gm12403          | 951        | chr4       | 11.56       | 1.10x10 <sup>-4</sup>  |
| B, Downregulated |            |            |             |                        |
| lncRNA           | RNA length | Chromosome | Fold change | P-value                |
| Ftsj1            | 1,791      | chrX       | 202.80      | 4.14x10 <sup>-11</sup> |
| Rpl7l1-ps1       | 725        | chrX       | 109.49      | 9.82x10 <sup>-9</sup>  |
| AK087886         | 1,056      | chr10      | 95.20       | 1.67x10 <sup>-9</sup>  |
| Gm14964          | 519        | chr19      | 90.52       | 1.44x10 <sup>-6</sup>  |
| Smim22           | 305        | chr16      | 68.14       | 6.32x10 <sup>-9</sup>  |
| G630055G22Rik    | 1,332      | chr18      | 62.12       | 2.97x10 <sup>-6</sup>  |
| XLOC_017302      | 522        | chr4       | 61.42       | 4.31x10 <sup>-6</sup>  |
| Amz2             | 1,846      | chr11      | 57.24       | 9.38x10 <sup>-7</sup>  |
| Gm12040          | 537        | chr11      | 57.15       | 4.22x10 <sup>-6</sup>  |
| Gm15833          | 957        | chr1       | 56.50       | 2.23x10 <sup>-6</sup>  |

lncRNA, long non-coding RNA.

Table SIII. Top ten up- and downregulated expressed miRNAs in mice hearts after ischemia/reperfusion procedure.

| A, Upregulated               |             |                       |
|------------------------------|-------------|-----------------------|
| miRNA                        | Fold change | P-value               |
| mmu-miR-33-5p                | 10.17       | 2.93x10 <sup>-5</sup> |
| mmu-miR-3068-5p              | 5.40        | 8.84x10 <sup>-6</sup> |
| mmu-miR-329-3p               | 4.87        | 7.40x10 <sup>-4</sup> |
| mmu-miR-107-3p               | 4.65        | 7.46x10 <sup>-3</sup> |
| mmu-miR-103-3p               | 4.49        | 1.10x10 <sup>-4</sup> |
| mmu-miR-301a-3p              | 3.50        | 2.44x10 <sup>-2</sup> |
| mmu-miR-139-5p               | 3.48        | 7.08x10 <sup>-3</sup> |
| mmu-miR-34b-3p               | 3.09        | 5.34x10 <sup>-3</sup> |
| mmu-miR-325-3p               | 2.94        | 1.46x10 <sup>-3</sup> |
| mmu-miR-29b-3p               | 2.82        | 4.91x10 <sup>-2</sup> |
| B, Downregulated             |             |                       |
| miRNA                        | Fold change | P-value               |
| mmu-miR-378b/mmu-miR-378c    | 59.45       | 3.90x10 <sup>-4</sup> |
| mmu-miR-378a-3p              | 32.94       | 7.28x10 <sup>-3</sup> |
| mmu-miR-378b                 | 21.07       | 4.90x10 <sup>-4</sup> |
| mmu-miR-143-3p               | 7.75        | 7.90x10 <sup>-4</sup> |
| mmu-miR-145a-5p/mmu-miR-145b | 4.79        | 1.88x10 <sup>-2</sup> |
| mmu-miR-106b-5p              | 2.98        | 1.18x10 <sup>-2</sup> |
| mmu-miR-5624-5p              | 2.83        | 4.65x10 <sup>-3</sup> |
| mmu-miR-23a-3p               | 2.80        | 1.66x10 <sup>-2</sup> |
| mmu-miR-30e-3p               | 2.64        | 4.40x10 <sup>-4</sup> |
| mmu-miR-1192                 | 2.58        | 4.84x10 <sup>-3</sup> |

miRNA/miR, microRNA.

Table SIV. Top ten up- and downregulated expressed mRNAs in mice hearts after ischemia/reperfusion procedure.

| A, Upregulated   |            |            |             |                        |
|------------------|------------|------------|-------------|------------------------|
| mRNA             | RNA length | Chromosome | Fold change | P-value                |
| Pdk4             | 3453       | chr6       | 47.34       | 1.46x10 <sup>-7</sup>  |
| Gm20594          | 334        | chr6       | 19.66       | 1.64x10 <sup>-6</sup>  |
| Xirp1            | 5839       | chr9       | 18.27       | 3.57x10 <sup>-7</sup>  |
| Ndufb6           | 534        | chr4       | 16.88       | 1.75x10 <sup>-5</sup>  |
| Acadl            | 1948       | chr1       | 14.98       | 1.80x10 <sup>-5</sup>  |
| Gm5595           | 3166       | chr7       | 14.39       | 3.65x10 <sup>-5</sup>  |
| Gm12657          | 978        | chr4       | 14.07       | 2.45x10 <sup>-5</sup>  |
| Sucla2           | 2108       | chr14      | 13.93       | 8.11x10 <sup>-6</sup>  |
| Junb             | 1840       | chr8       | 13.01       | 4.14x10 <sup>-5</sup>  |
| Acadm            | 2062       | chr3       | 11.88       | 3.07x10 <sup>-5</sup>  |
| B, Downregulated |            |            |             |                        |
| mRNA             | RNA length | Chromosome | Fold change | P-value                |
| Fdft1            | 2882       | chr14      | 303.25      | 1.07x10 <sup>-10</sup> |
| Elovl1           | 1781       | chr4       | 175.80      | 8.16x10 <sup>-9</sup>  |
| Serpine1         | 3024       | chr5       | 162.45      | 1.49x10 <sup>-9</sup>  |
| 2010002M12Rik    | 3365       | chr19      | 148.82      | 3.36x10 <sup>-9</sup>  |
| Mrgprg           | 1847       | chr7       | 104.72      | 1.58x10 <sup>-8</sup>  |
| Ifi27            | 1053       | chr12      | 100.28      | 1.39x10 <sup>-10</sup> |
| Tnfaip8l2        | 1122       | chr3       | 74.16       | 3.12x10 <sup>-6</sup>  |
| Supt16           | 4491       | chr14      | 69.27       | 5.85x10 <sup>-6</sup>  |
| Stat4            | 2981       | chr1       | 68.02       | 5.87x10 <sup>-9</sup>  |
| Olfml1           | 1969       | chr7       | 67.17       | 2.72x10 <sup>-6</sup>  |

Table SV. Functional classification of the differentially expressed genes by Gene Ontology analysis.

| A, Upregulated                                                    |       |                  |                        |
|-------------------------------------------------------------------|-------|------------------|------------------------|
| Term                                                              | Count | Enrichment score | P-value                |
| GDP binding                                                       | 39    | 9.76             | 1.73x10 <sup>-10</sup> |
| RNA polymerase II carboxy-terminal domain kinase activity         | 12    | 3.33             | 4.70x10 <sup>-4</sup>  |
| TBP-class protein binding                                         | 12    | 3.33             | 4.70x10 <sup>-4</sup>  |
| NAD <sup>+</sup> binding                                          | 10    | 2.98             | 1.06x10 <sup>-3</sup>  |
| Protein phosphatase type 2A regulator activity                    | 8     | 2.63             | 2.36x10 <sup>-3</sup>  |
| Macromolecule transmembrane transporter activity                  | 8     | 2.63             | 2.36x10 <sup>-3</sup>  |
| Misfolded protein binding                                         | 8     | 2.63             | 2.36x10 <sup>-3</sup>  |
| RNA polymerase I activity                                         | 9     | 2.59             | 2.60x10 <sup>-3</sup>  |
| Vinculin binding                                                  | 9     | 2.59             | 2.60x10 <sup>-3</sup>  |
| Angiotensin receptor binding                                      | 9     | 2.59             | 2.60x10 <sup>-3</sup>  |
| B, Downregulated                                                  |       |                  |                        |
| Term                                                              | Count | Enrichment score | P-value                |
| Proline-rich region binding                                       | 9     | 3.06             | 8.60x10 <sup>-4</sup>  |
| Sodium ion binding                                                | 6     | 2.85             | 1.41x10 <sup>-3</sup>  |
| Armadillo repeat domain binding                                   | 6     | 2.85             | 1.41x10 <sup>-3</sup>  |
| Alkali metal ion binding                                          | 8     | 2.75             | 1.78x10 <sup>-3</sup>  |
| Peroxisome proliferator activated receptor binding                | 8     | 2.75             | 1.78x10 <sup>-3</sup>  |
| G-protein $\beta$ -subunit binding                                | 6     | 2.57             | 2.71x10 <sup>-3</sup>  |
| C2H2 zinc finger domain binding                                   | 6     | 2.12             | 7.67x10 <sup>-3</sup>  |
| Intracellular cyclic nucleotide activated cation channel activity | 5     | 1.79             | 1.61x10 <sup>-2</sup>  |
| High voltage-gated calcium channel activity                       | 5     | 1.79             | 1.61x10 <sup>-2</sup>  |
| Cyclic nucleotide-gated ion channel activity                      | 5     | 1.79             | 1.61x10 <sup>-2</sup>  |

TBP, TATA-binding protein; C2H2, Cys2His2-like fold group.

Table SVI. Functional classification of the differentially expressed genes by pathway analysis.

| A, Upregulated                                  |       |                  |                       |
|-------------------------------------------------|-------|------------------|-----------------------|
| Term                                            | Count | Enrichment score | P-value               |
| Alzheimer's disease                             | 178   | 7.63             | 1.64x10 <sup>-7</sup> |
| Sphingolipid signaling pathway                  | 124   | 6.78             | 5.35x10 <sup>-7</sup> |
| Protein processing in endoplasmic reticulum     | 169   | 6.27             | 2.36x10 <sup>-6</sup> |
| Non-alcoholic fatty liver disease               | 158   | 5.63             | 6.05x10 <sup>-6</sup> |
| Parkinson's disease                             | 152   | 5.22             | 6.82x10 <sup>-6</sup> |
| Ribosome                                        | 148   | 5.17             | 6.93x10 <sup>-6</sup> |
| Carbon metabolism                               | 118   | 5.16             | 7.19x10 <sup>-6</sup> |
| Biosynthesis of antibiotics                     | 219   | 5.14             | 1.11x10 <sup>-5</sup> |
| mRNA surveillance pathway                       | 96    | 4.96             | 1.83x10 <sup>-5</sup> |
| Citrate cycle                                   | 32    | 4.74             | 9.91x10 <sup>-7</sup> |
| B, Downregulated                                |       |                  |                       |
| Term                                            | Count | Enrichment score | P-value               |
| Endocytosis                                     | 234   | 6.00             | 7.50x10 <sup>-4</sup> |
| Bacterial invasion of epithelial cells          | 78    | 3.13             | 1.27x10 <sup>-3</sup> |
| Type II diabetes mellitus                       | 50    | 2.90             | 1.64x10 <sup>-3</sup> |
| Oxytocin signaling pathway                      | 159   | 2.79             | 2.00x10 <sup>-3</sup> |
| Arrhythmogenic right ventricular cardiomyopathy | 74    | 2.70             | 2.45x10 <sup>-3</sup> |
| Nicotine addiction                              | 40    | 2.61             | 2.57x10 <sup>-3</sup> |
| Morphine addiction                              | 94    | 2.59             | 4.33x10 <sup>-3</sup> |
| Amphetamine addiction                           | 69    | 2.36             | 4.58x10 <sup>-3</sup> |
| Transcriptional misregulation in cancer         | 178   | 2.34             | 7.22x10 <sup>-3</sup> |
| Ras signaling pathway                           | 230   | 2.14             | 1.64x10 <sup>-7</sup> |

Table SVII. Highest degree list of miRNAs, mRNAs and lncRNAs in myocardial ischemia/reperfusion injury via competing endogenous RNA analysis.

| A, miRNA        |        |
|-----------------|--------|
| Gene            | Degree |
| mmu-miR-330-3p  | 67     |
| mmu-miR-107-3p  | 61     |
| mmu-miR-103-3p  | 60     |
| mmu-miR-125a-5p | 56     |
| mmu-miR-125b-5p | 55     |
| mmu-miR-669h-3p | 45     |
| mmu-miR-1224-3p | 35     |
| mmu-miR-190a-5p | 32     |
| mmu-miR-330-3p  | 31     |
| mmu-miR-3084-3p | 31     |
| B, mRNAs        |        |
| Gene            | Degree |
| Plxna4          | 7      |
| Twf1            | 7      |
| Plcx2           | 7      |
| Eif5            | 7      |
| Cfl2            | 7      |
| Vamp1           | 7      |
| Gpr146          | 6      |
| Ap3d1           | 6      |
| Zfp711          | 6      |
| Antxr2          | 6      |
| C, lncRNAs      |        |
| Gene            | Degree |
| Rpl711-ps1      | 12     |

|               |    |
|---------------|----|
| 1600029O15Rik | 12 |
| Gm11407       | 11 |
| Gm12040       | 9  |
| AK155692      | 2  |

miRNA/miR, microRNA; lncRNA, long non-coding RNA; Plxna4, plexin A4; Twf1, twinfilin actin binding protein 1; Plcx2, phosphatidylinositol specific phospholipase C X domain containing 2; Eif5, eukaryotic translation initiation factor 5; Cfl2, cofilin 2; Vamp1, vesicle associated membrane protein 1; Gpr146, G protein-coupled receptor 146; Ap3d1, adaptor related protein complex 3 subunit  $\delta$  1; Zfp711, zinc finger protein 711; Antxr2, ANTXR cell adhesion molecule 2.
